# Supplementary figures and images for: Reconstruction of the Evolutionary History and Dispersal of Usutu Virus, a Neglected Emerging Arbovirus in Europe and Africa
Source: PubMed Central journal article supplement — mBio. 2016 Feb 2;7(1):e01938-15. doi: 10.1128/mBio.01938-15 (PMC4742707; doi:10.1128/mbio.01938-15), 2016-02-02

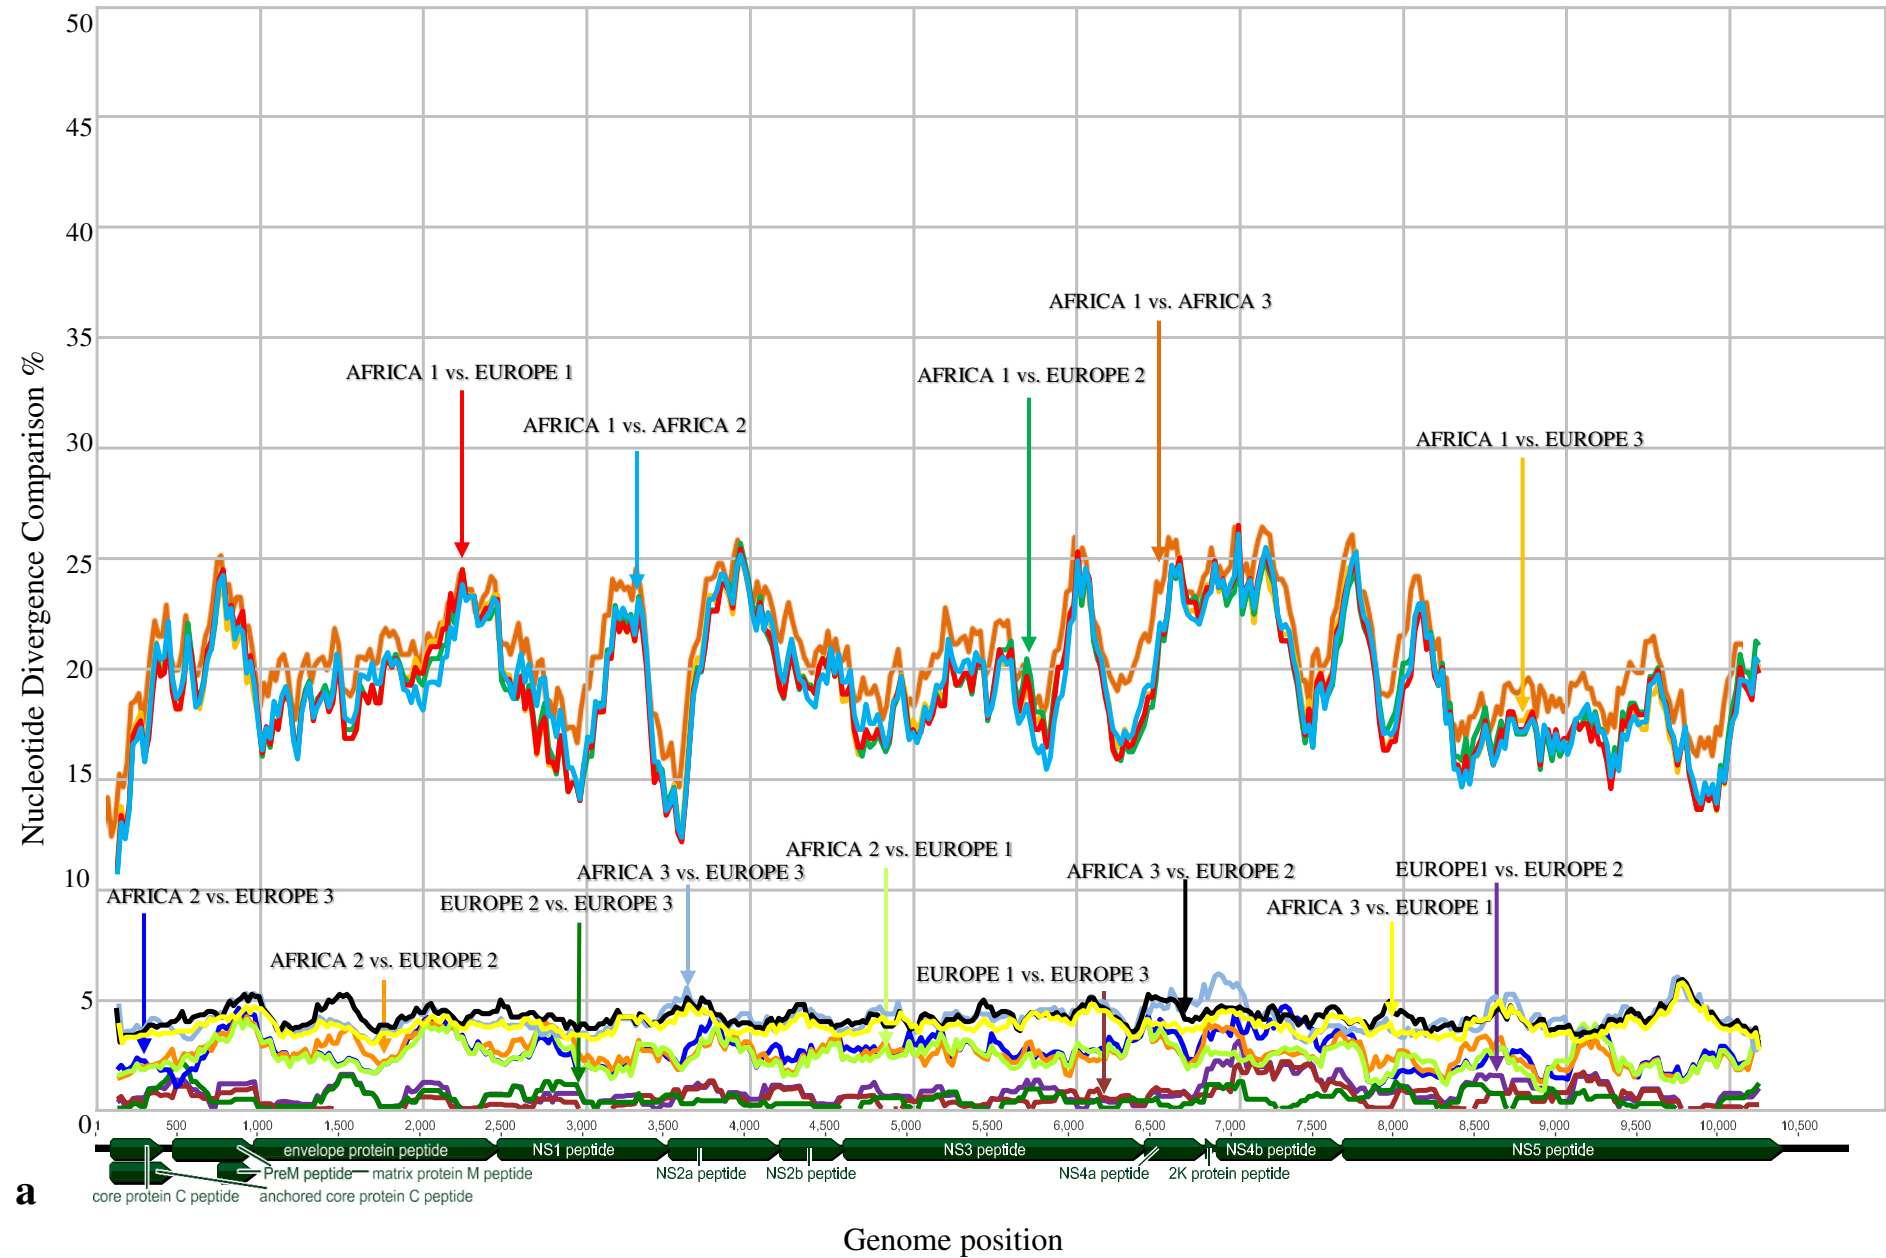

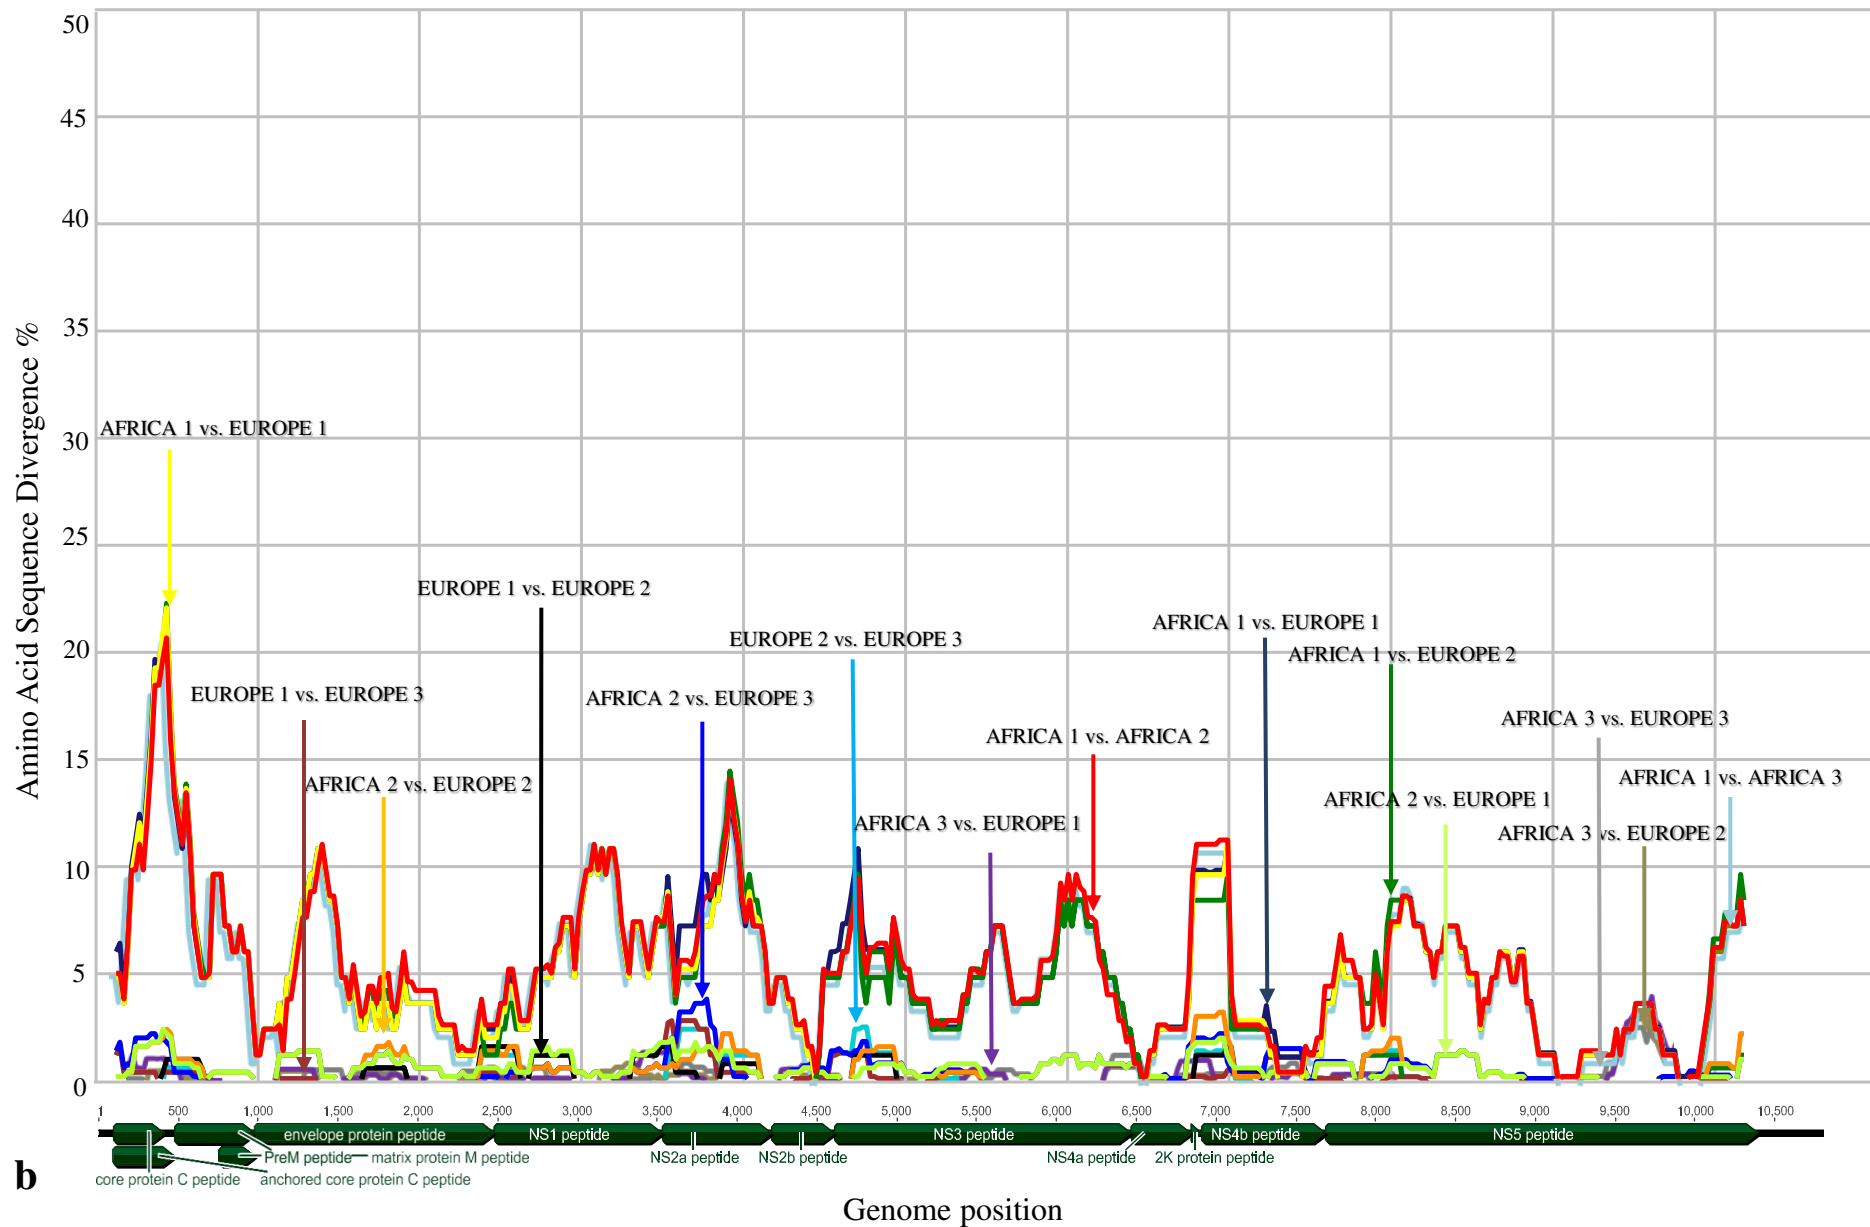

**b**

Supplement: mbo001162647sf1.pdf [file mbo001162647sf1.pdf]

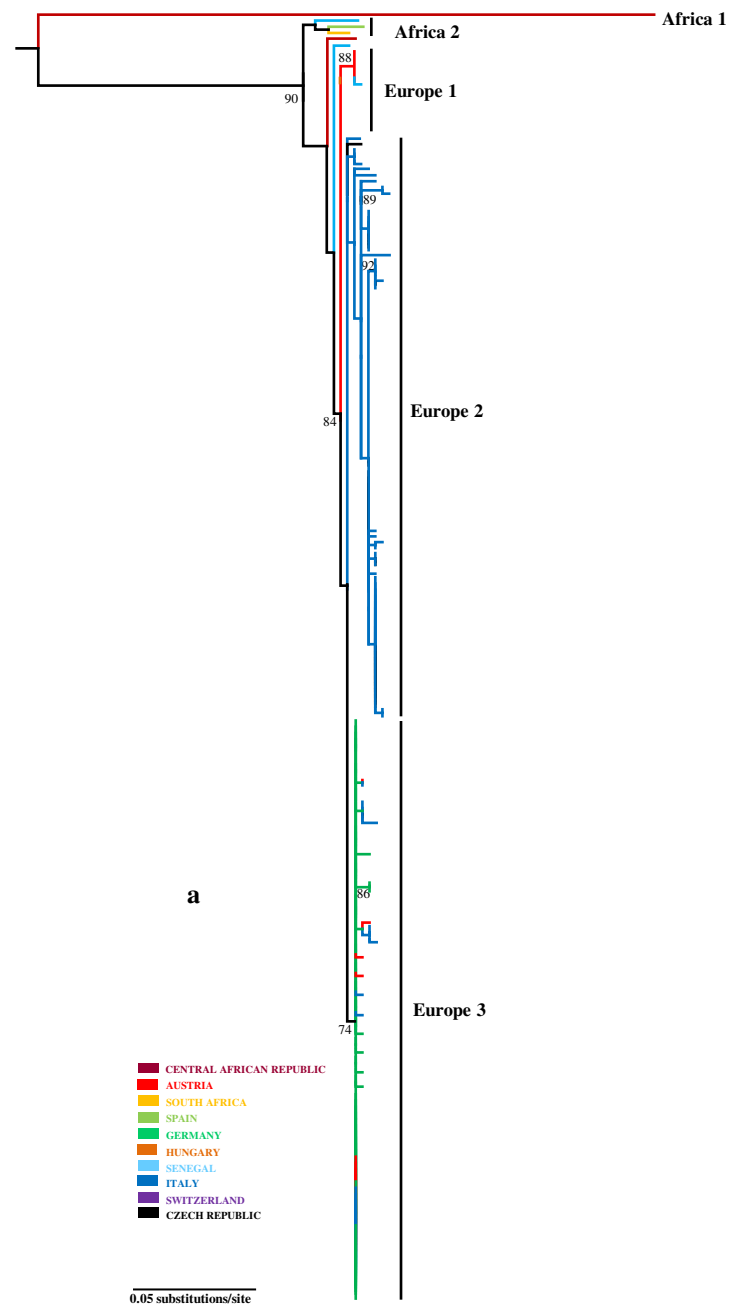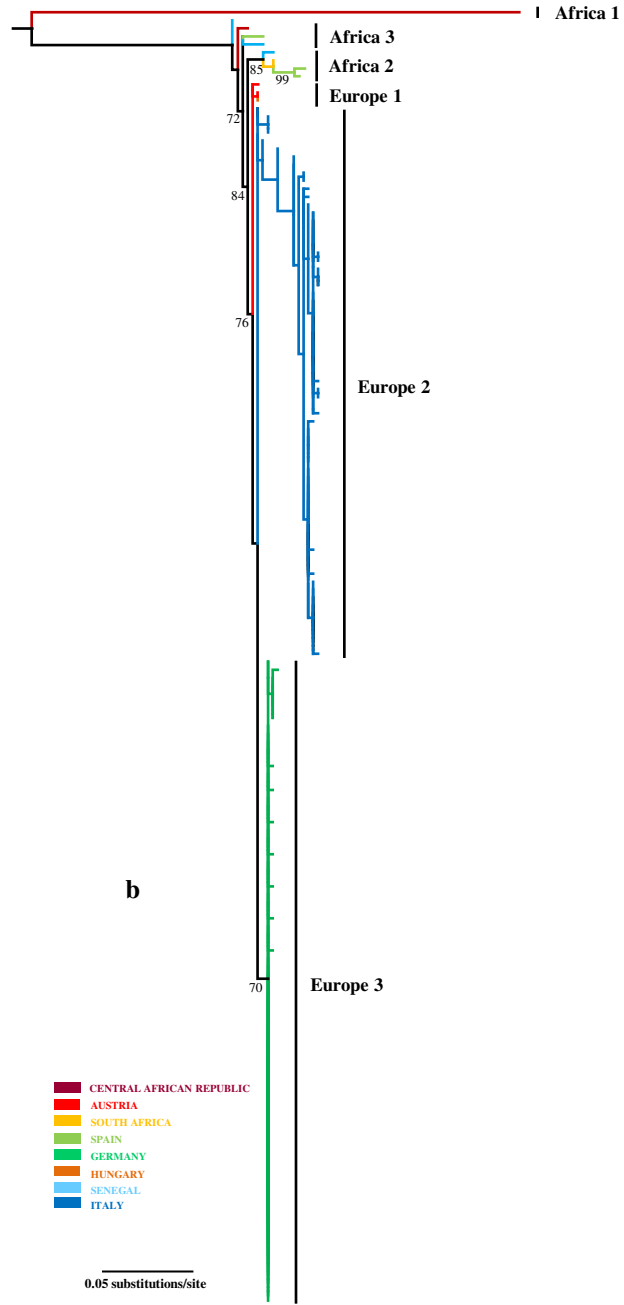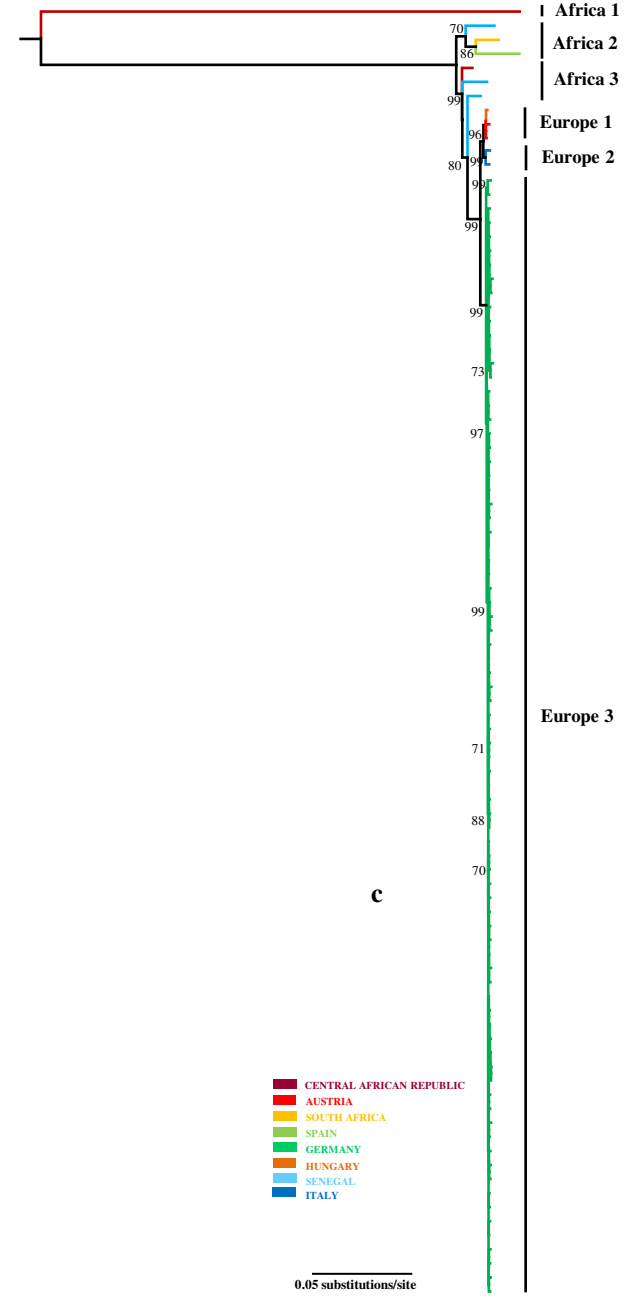

Supplement: mbo001162647sf2.pdf [file mbo001162647sf2.pdf]

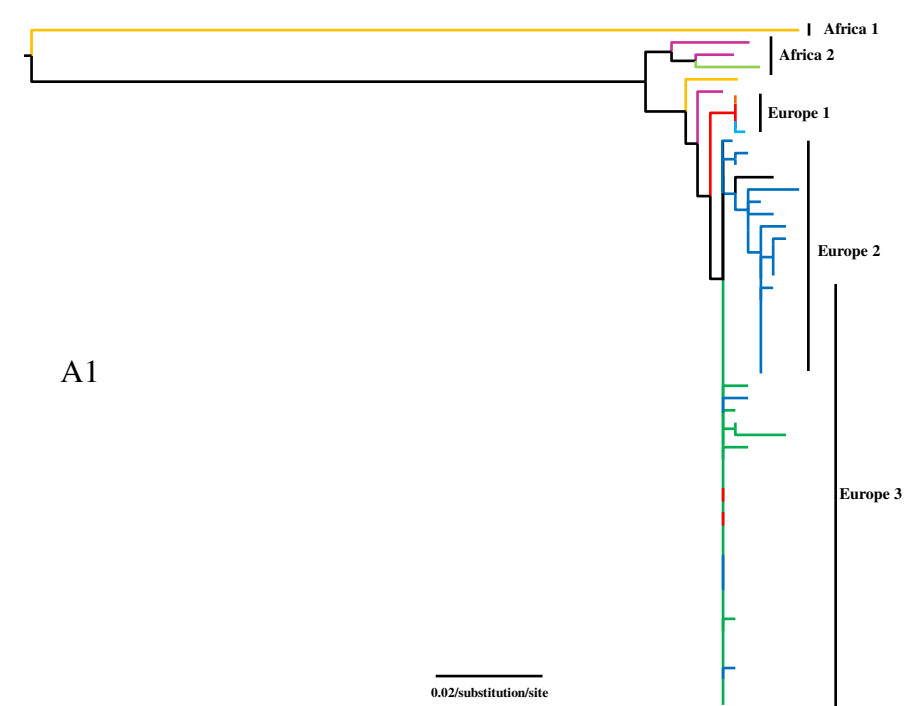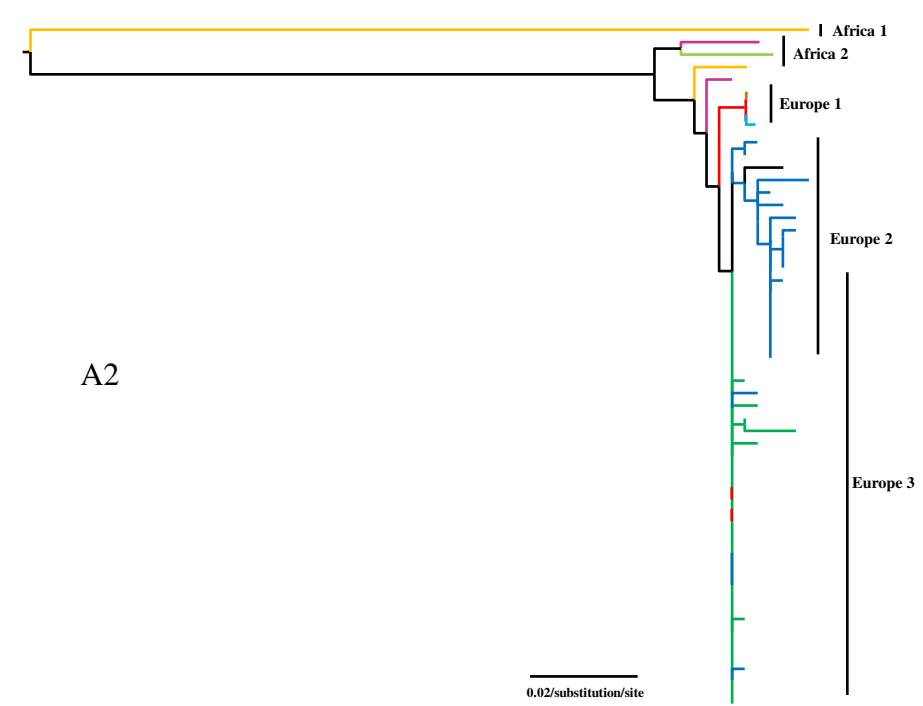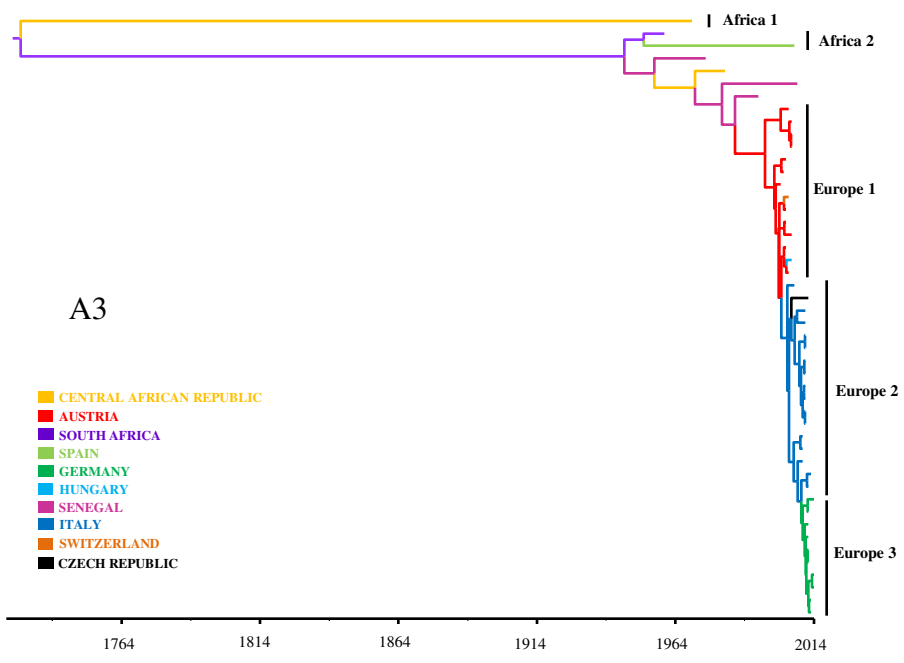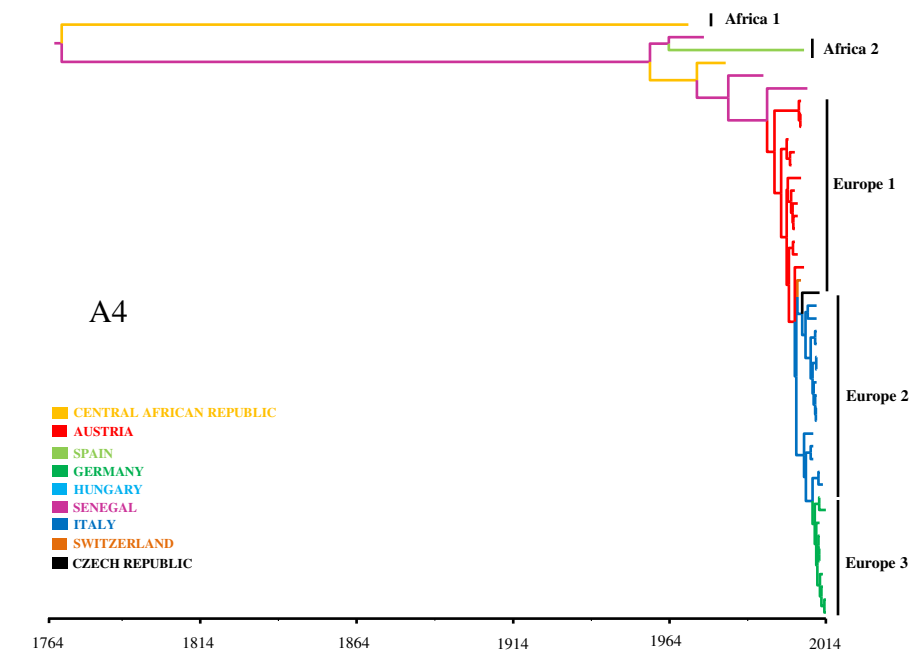

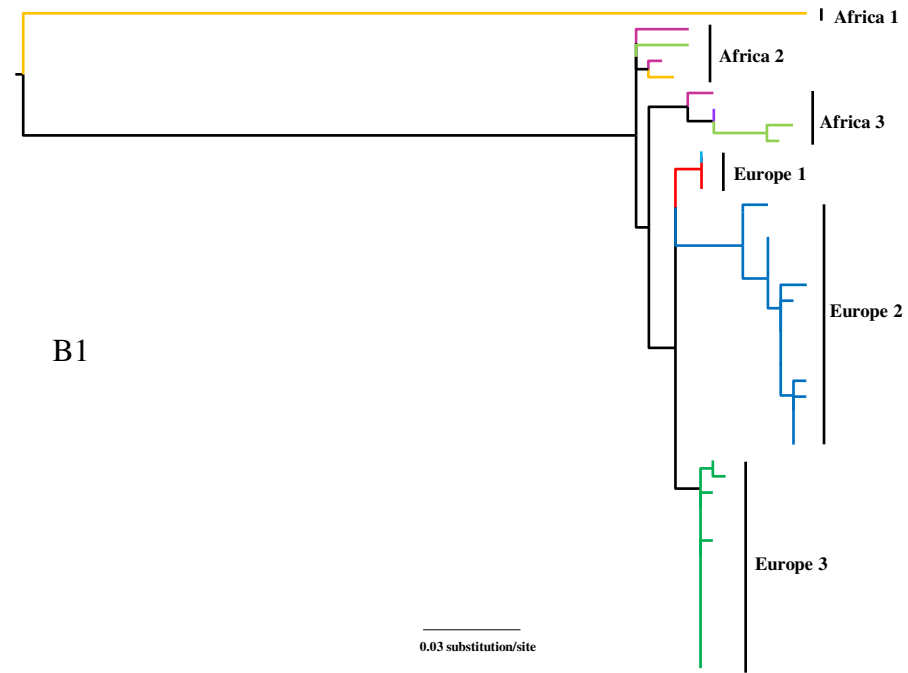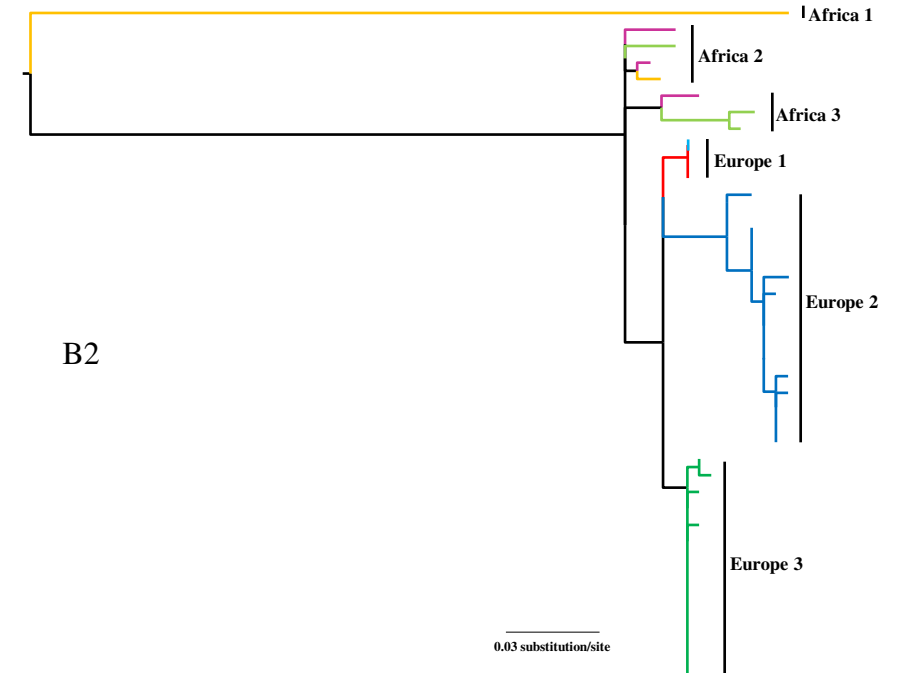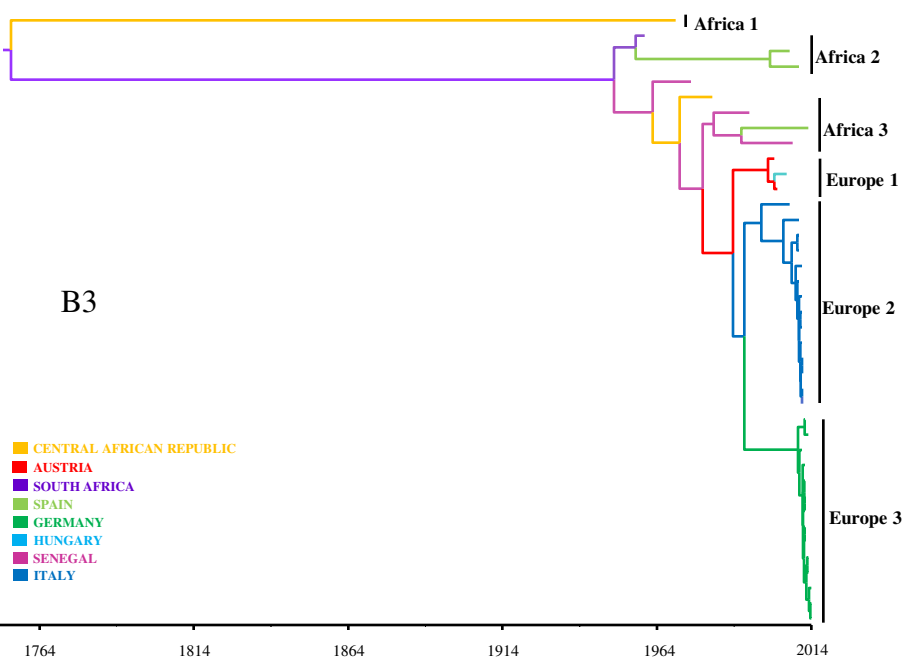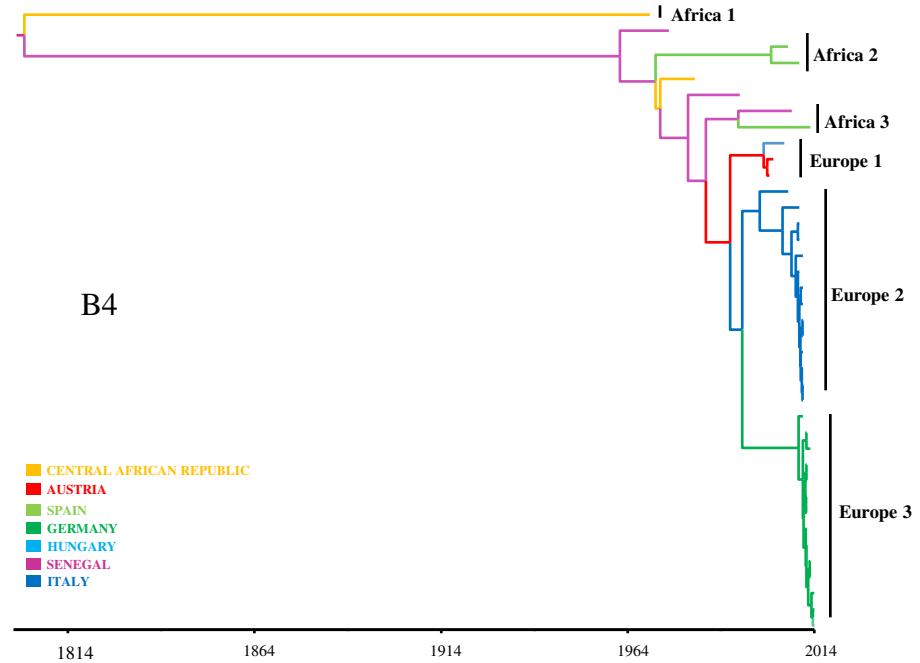

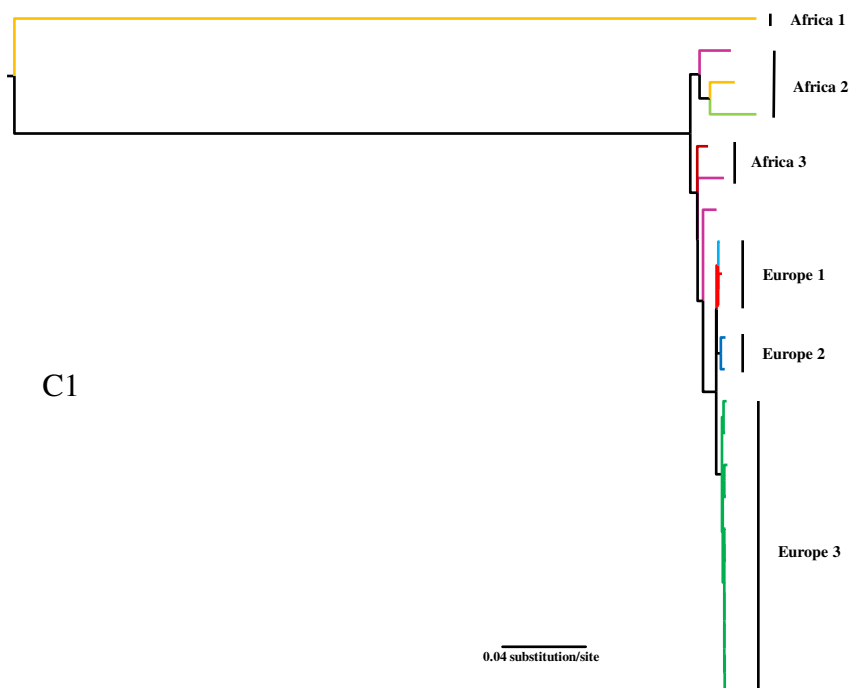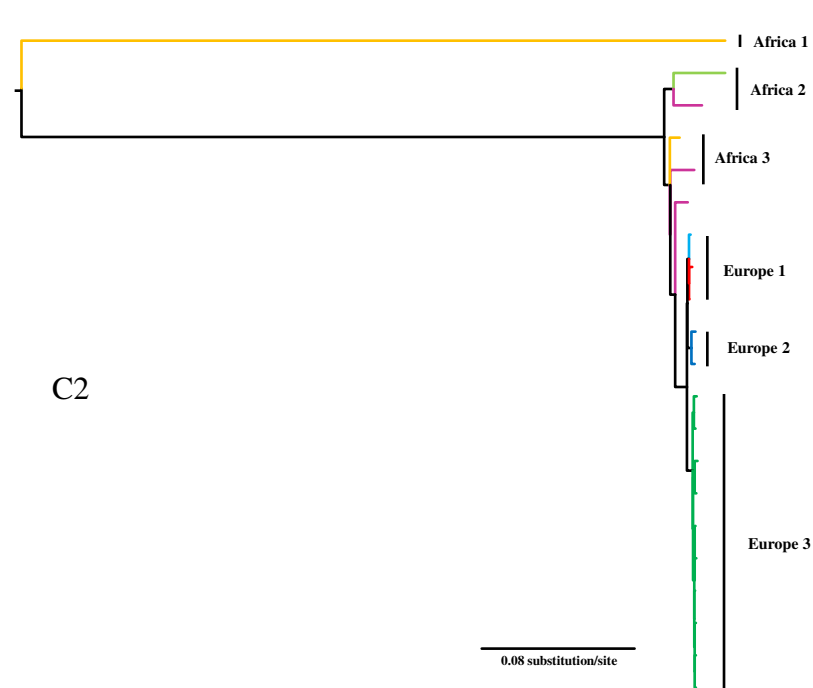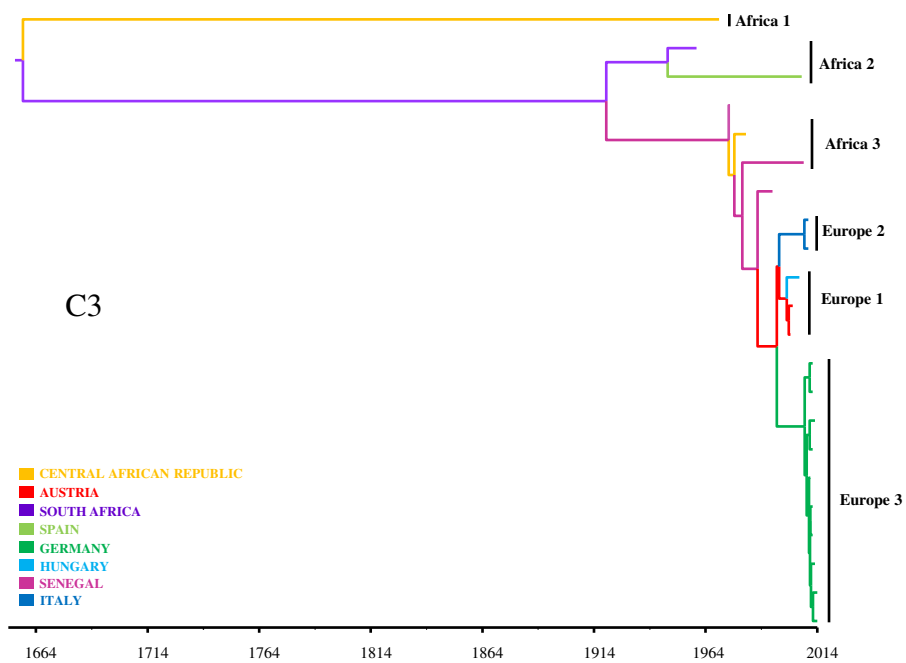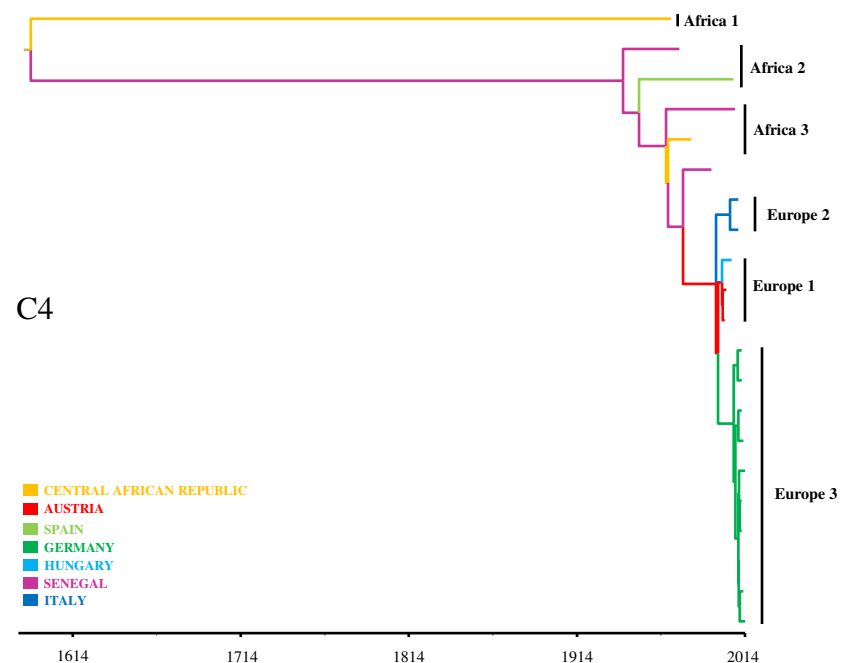

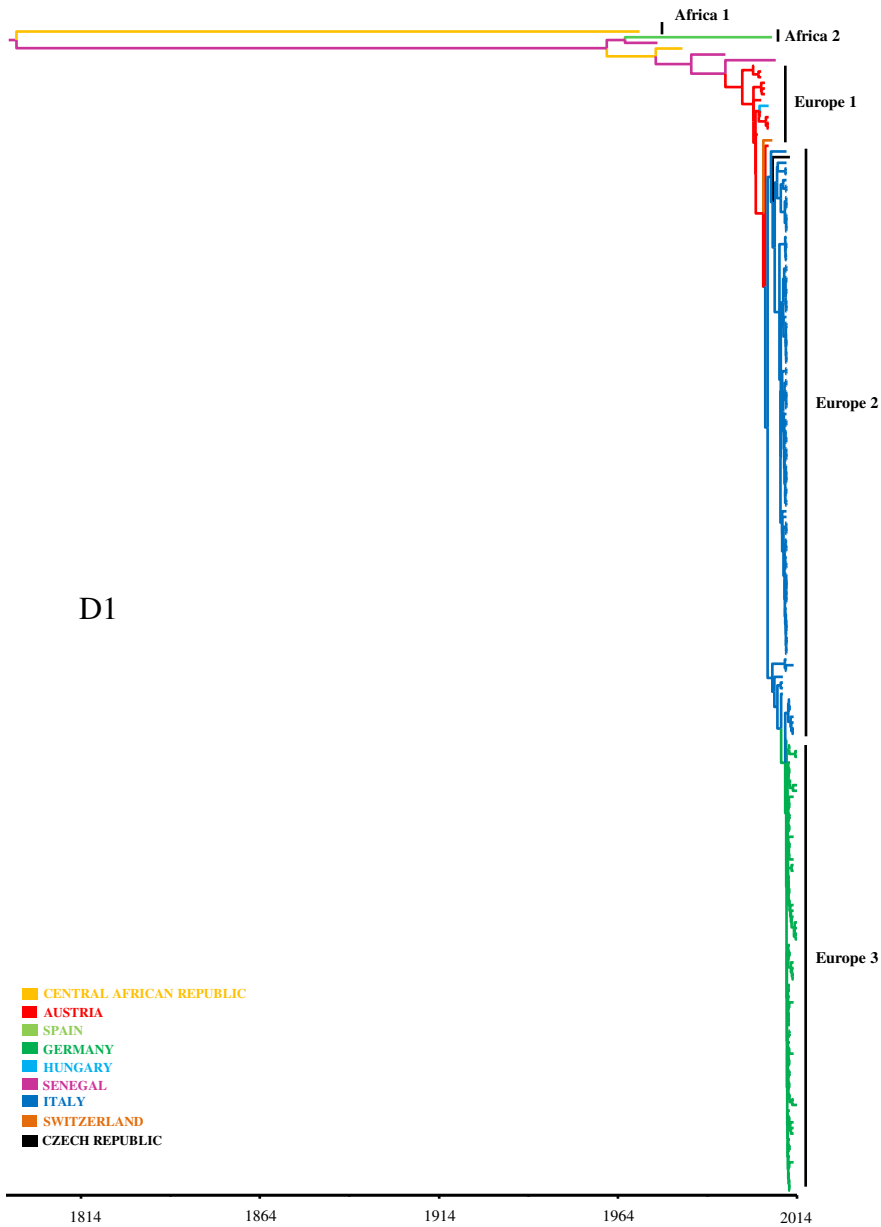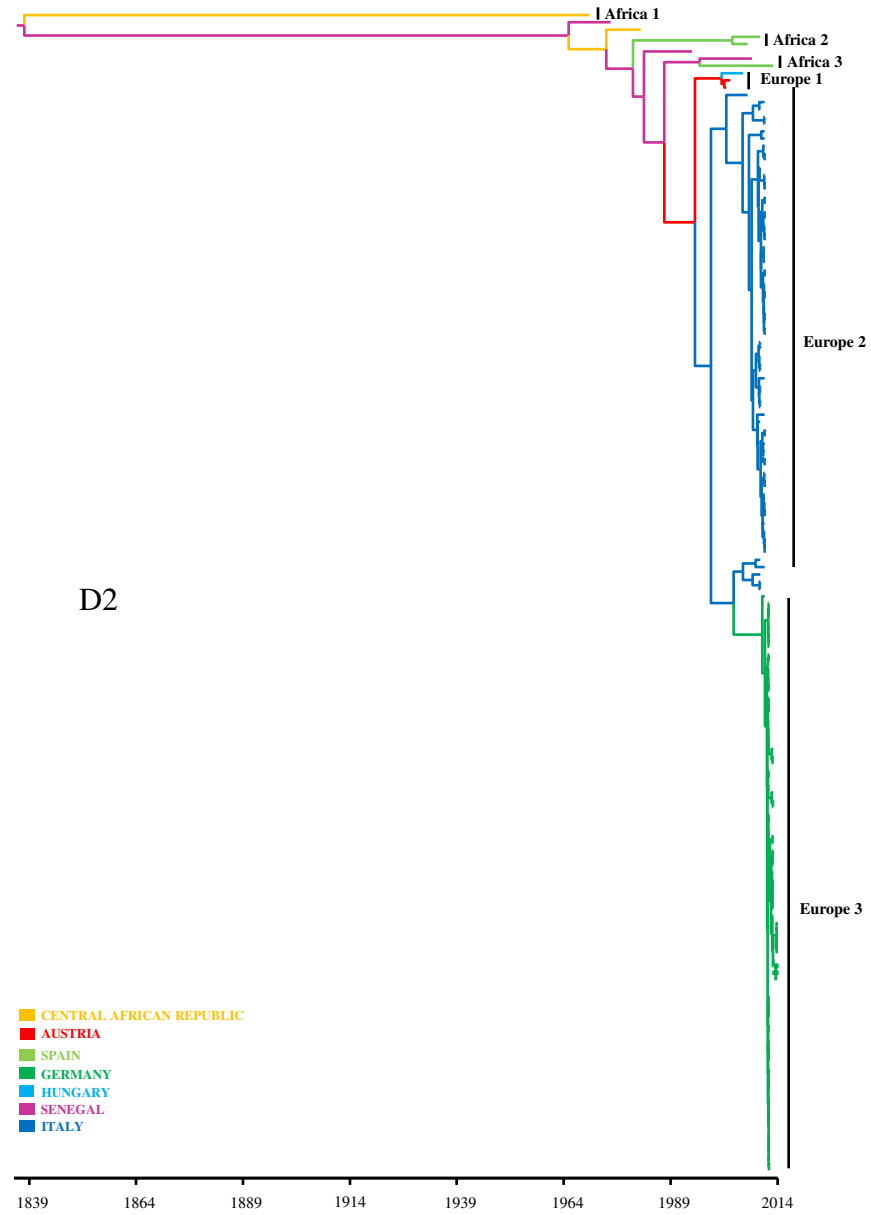

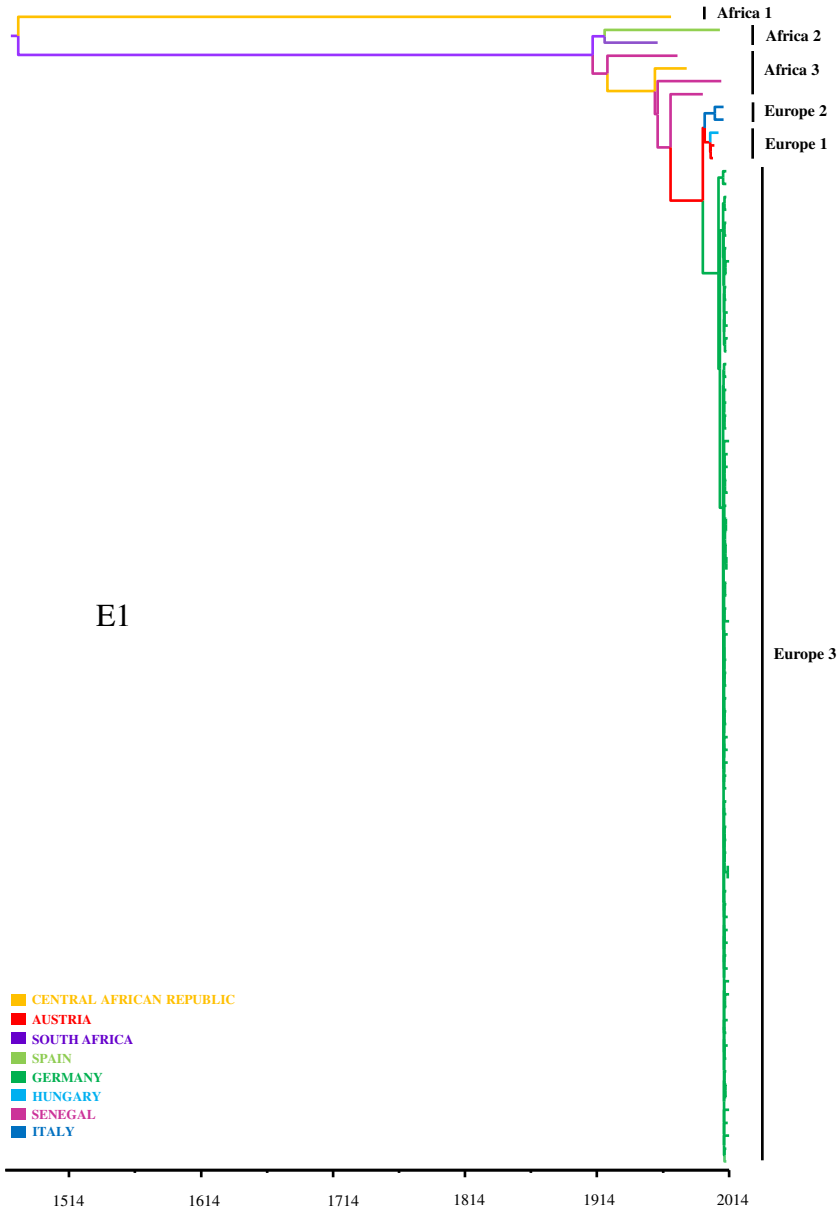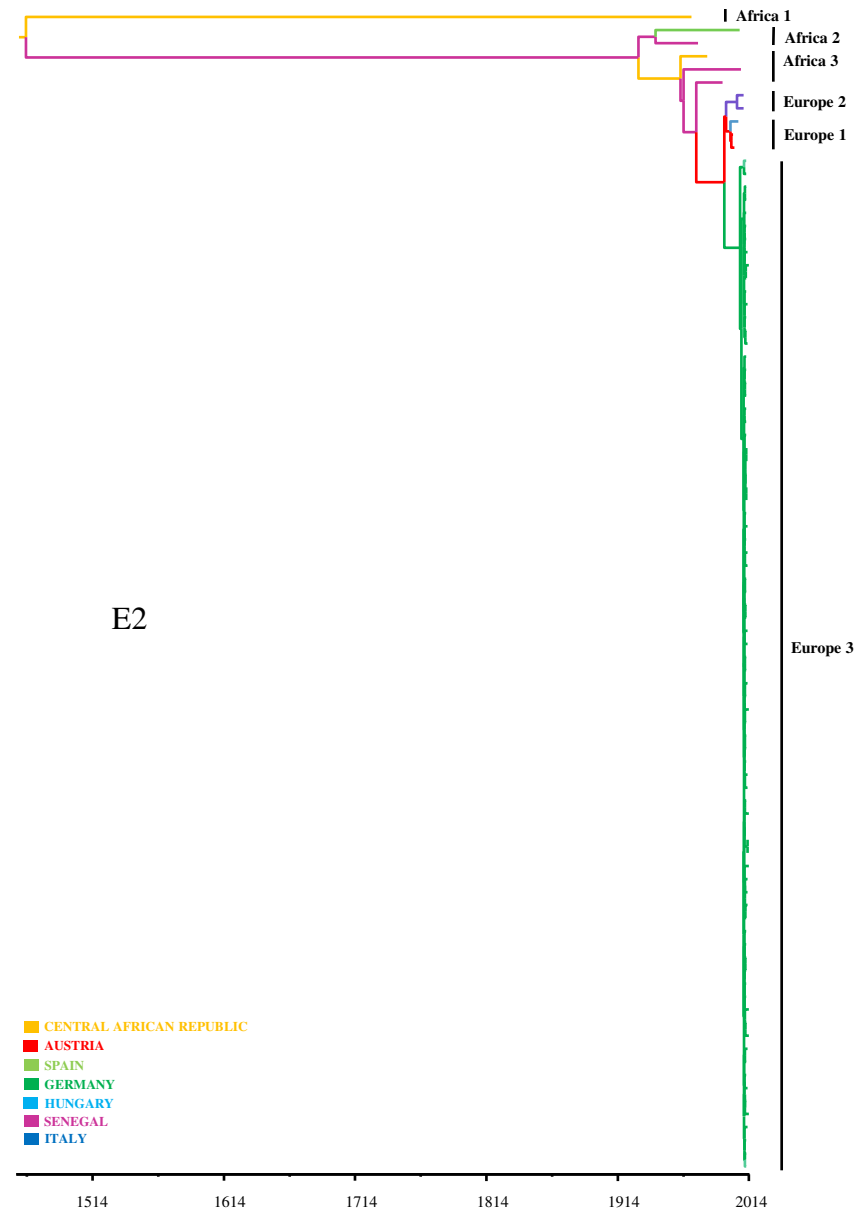

Supplement: mbo001162647sf3.pdf [file mbo001162647sf3.pdf]

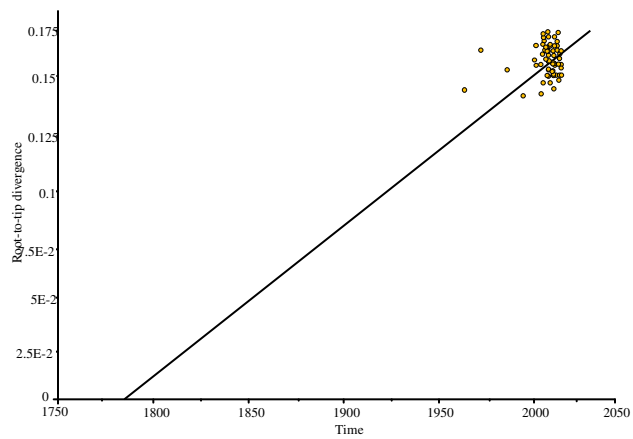

**E gene**

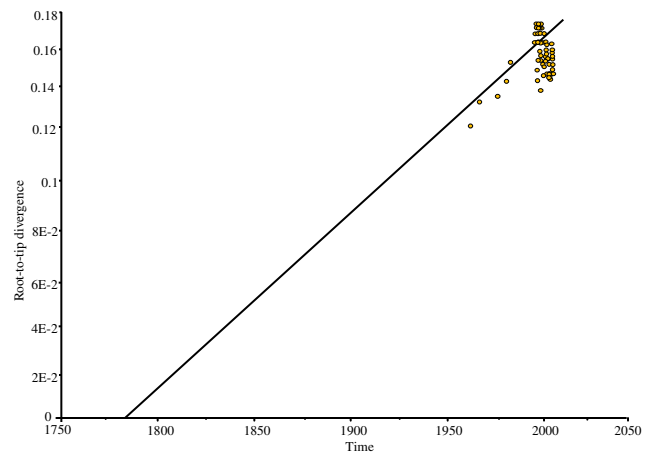

**NS5 gene**

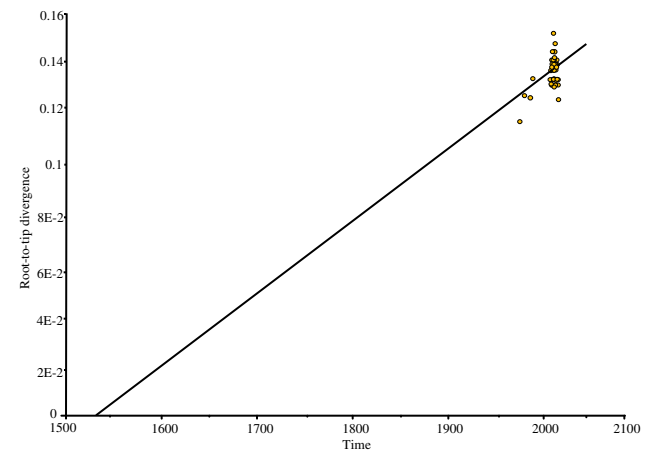

**Complete genome**

Supplement: mbo001162647sf4.pdf [file mbo001162647sf4.pdf]

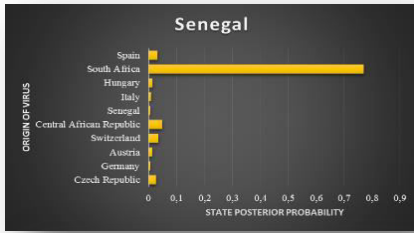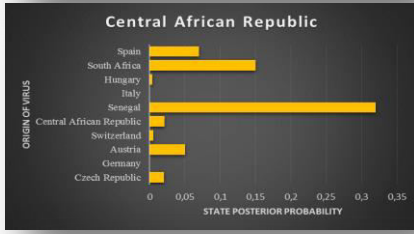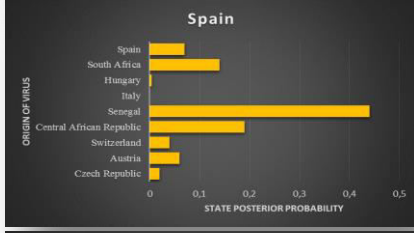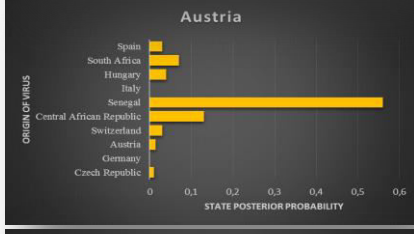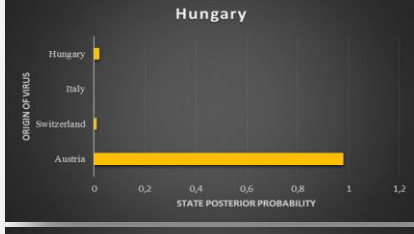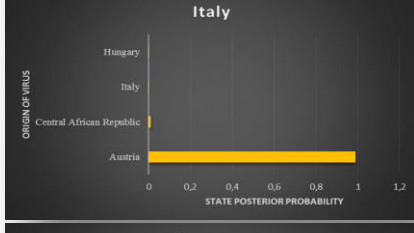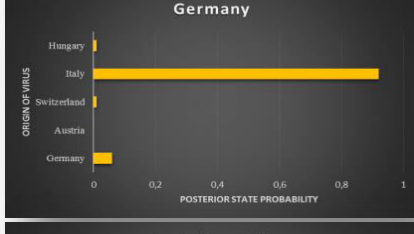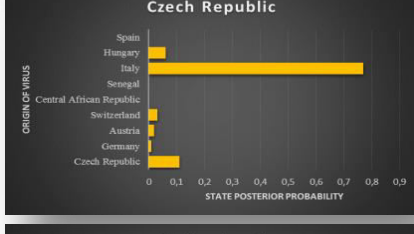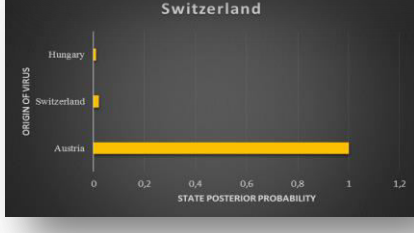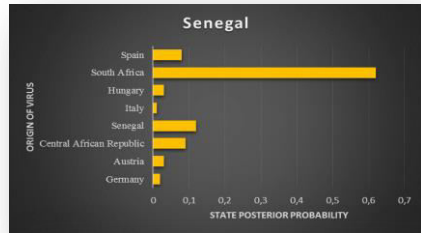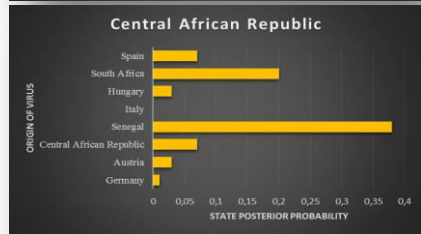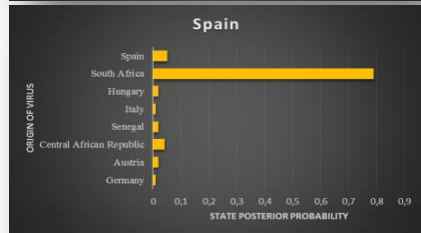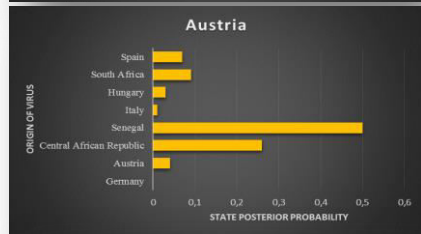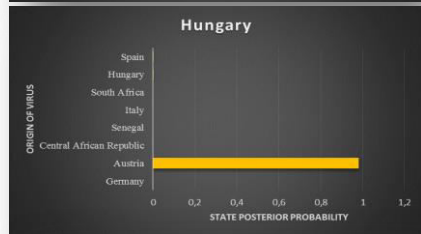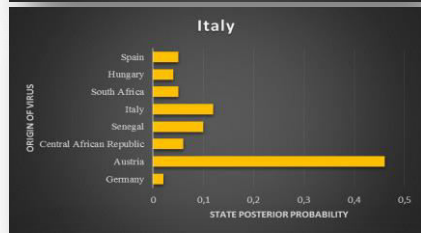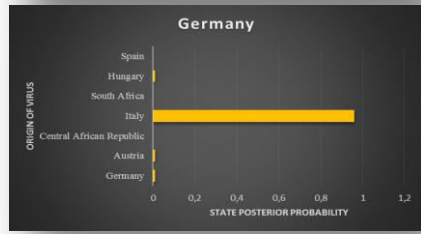

N/A

N/A

E gene

NS5 gene

Supplement: mbo001162647sf5.pdf [file mbo001162647sf5.pdf]

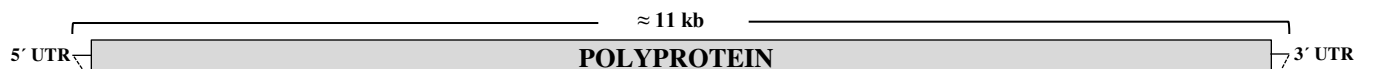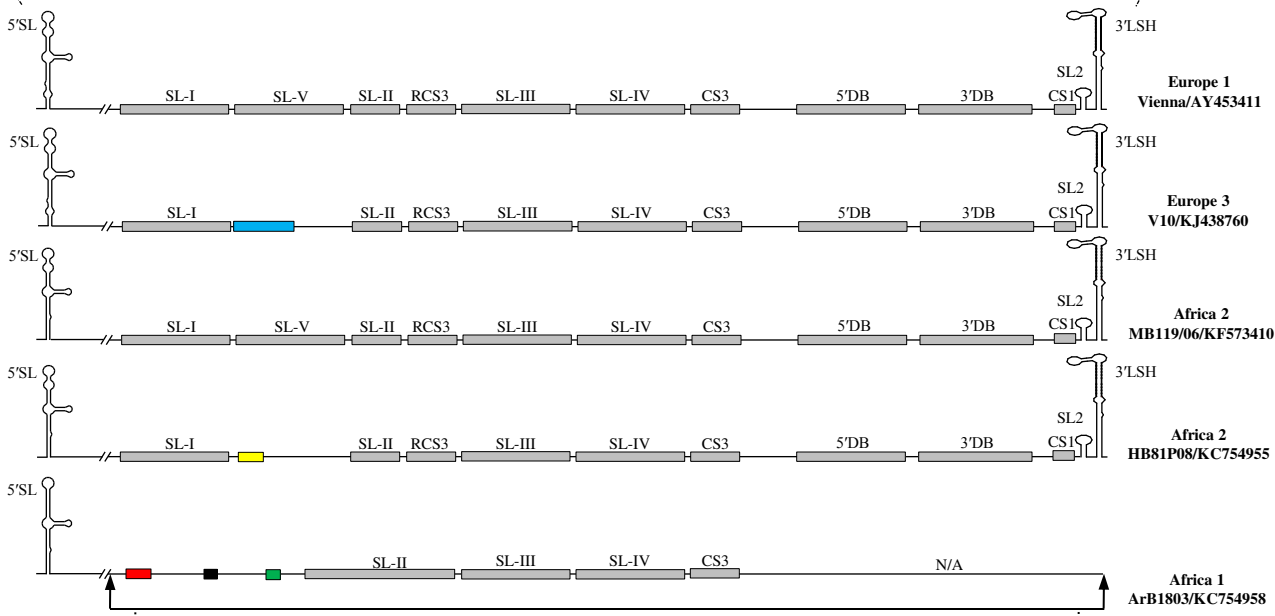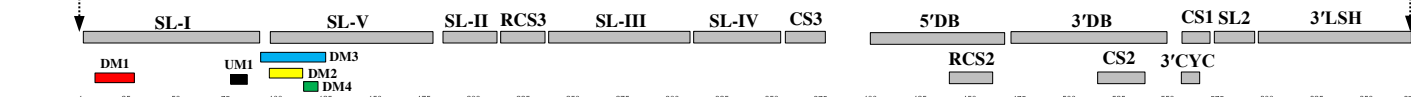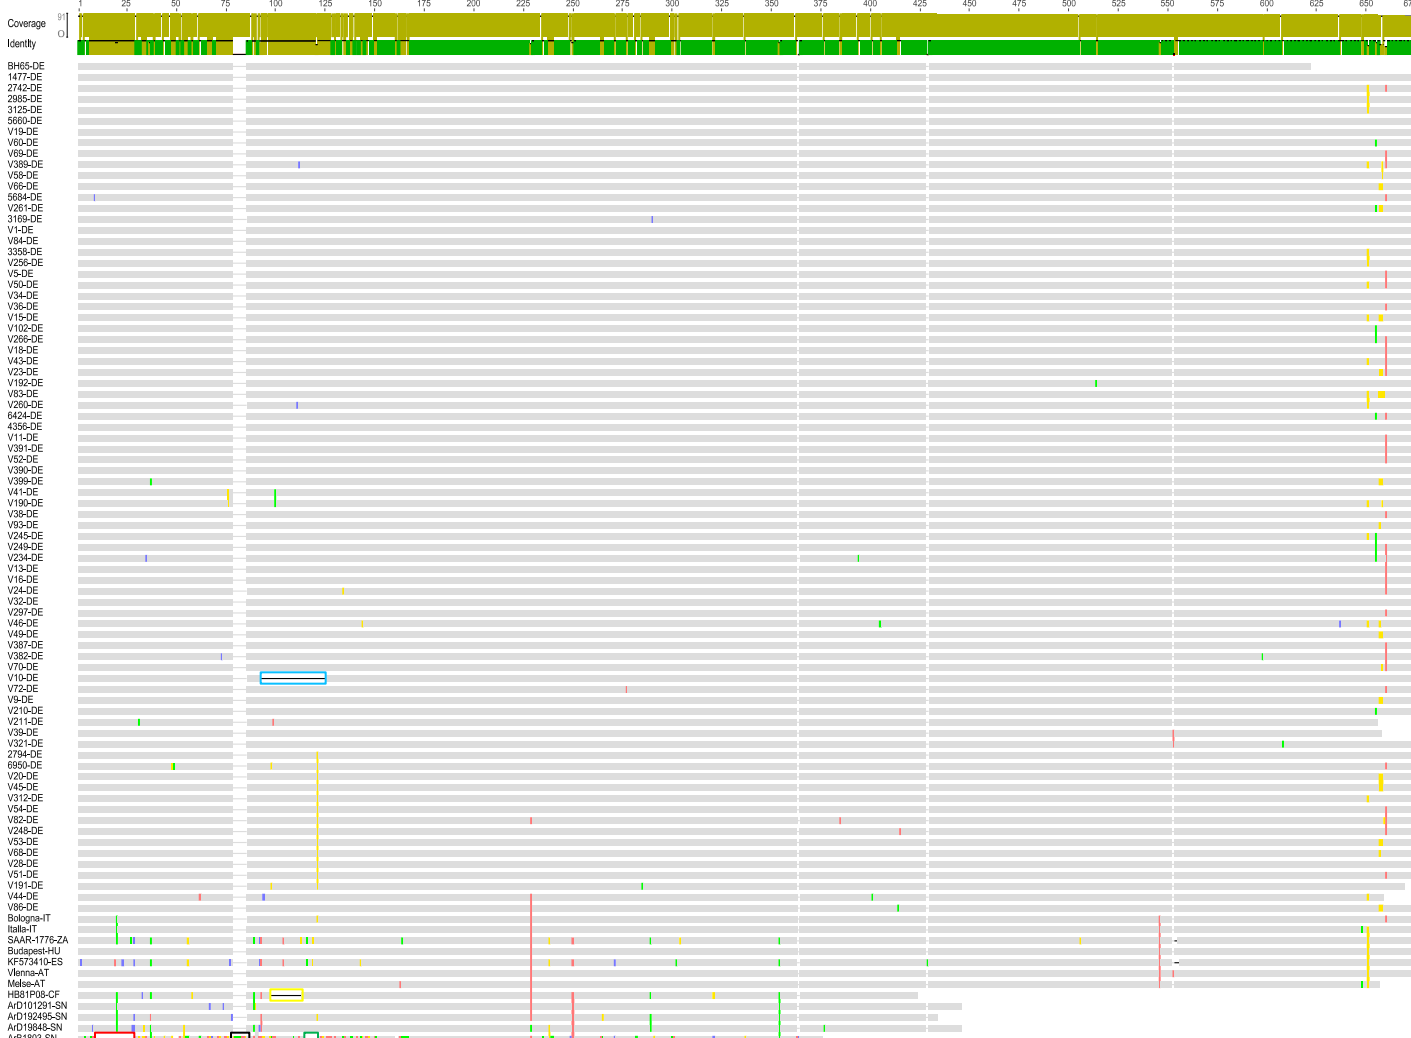

Supplement: mbo001162647sf6.pdf [file mbo001162647sf6.pdf]

| 2010  | 2011  | 2012  | 2013  |
|-------|-------|-------|-------|
| 54321 | 53230 | 25804 | 60100 |

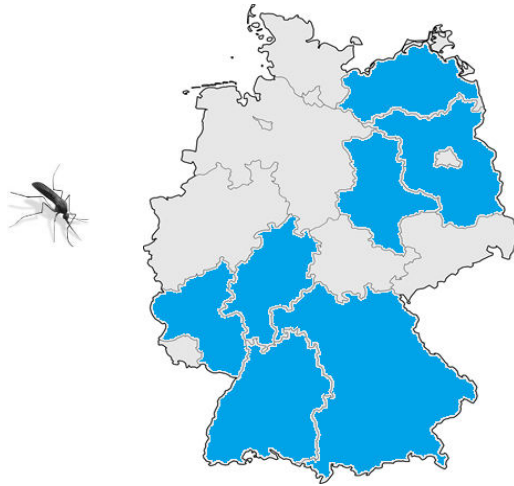

| 2010 | 2011 | 2012 | 2013 |
|------|------|------|------|
| 1    | 220  | 18   | 4    |

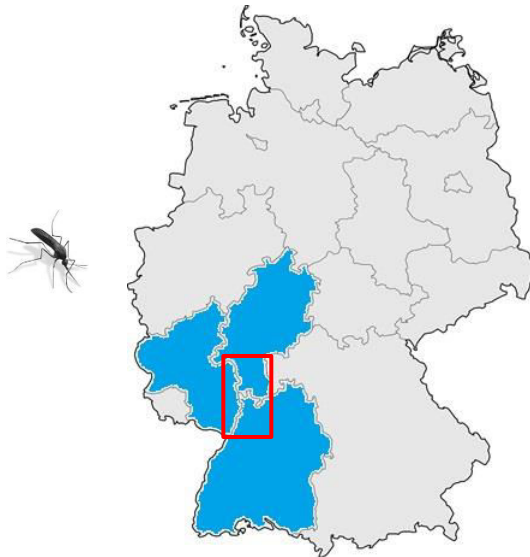

| 2010 | 2011 | 2012 | 2013 |
|------|------|------|------|
| 0    | 124  | 211  | 70   |

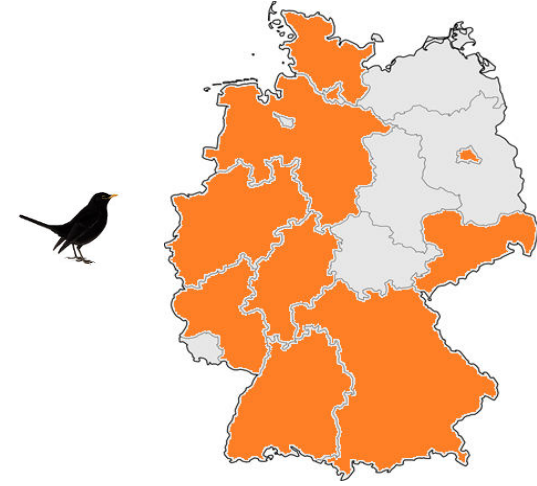

| 2010 | 2011 | 2012 | 2013 |
|------|------|------|------|
| 0    | 51   | 50   | 10   |

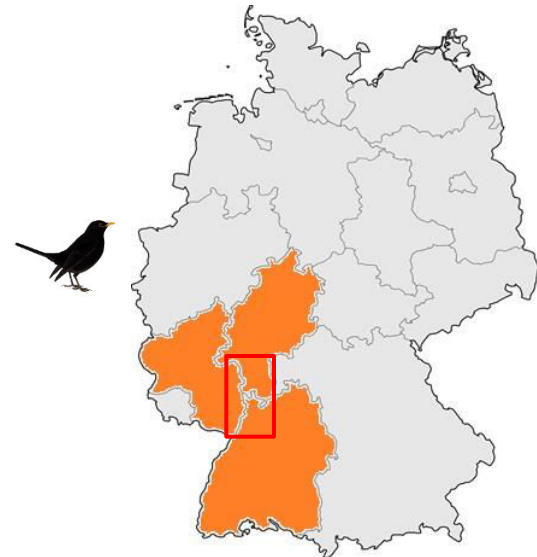

**A**

**B**

Supplement: mbo001162647sf7.pdf [file mbo001162647sf7.pdf]
